# Supplementary material
Source: publisher site journal article supplement (https://www.dovepress.com/article/323802)
Supplement: Supplementary file 1 [file get_supplementary_file.php]

# Horseradish peroxidase-functionalized gold nanoconjugates for breast cancer treatment based on enzyme prodrug therapy

Gema Vivo-Llorca,1,3,4 Ángela Morellá-Aucejo,1,3,4 Alba García-Fernández,*1,3,4 Paula Díez,1,3,4,6 Antoni Llopis-Lorente,1,7 Mar Orzáez3,4 and Ramón Martínez-Máñez*1,2,3,4,6

1Instituto Interuniversitario de Investigación de Reconocimiento Molecular y Desarrollo Tecnológico (IDM). Universitat Politècnica de València, Universitat de València. Spain;

2 Departamento de Química, Universitat Politècnica de València, València, Spain;

3 CIBER de Bioingeniería, Biomateriales y Nanomedicina (CIBER-BBN), Spain;

4 Unidad Mixta UPV-CIPF de Investigación de Mecanismos de Enfermedades y Nanomedicina, Valencia, Universitat Politècnica de València, Centro de Investigación Príncipe Felipe, València, Spain;

5 Centro de Investigación Príncipe Felipe, Laboratorio de Péptidos y Proteínas, València, Spain;

6 Unidad Mixta de Investigación en Nanomedicina y sensores.Universitat Politènica de València, Instituto de Investigación Sanitaria la Fe, Valènica, Spain;

7 Department of Chemical Engineering and Chemistry, Institute for Complex Molecular Systems, Eindhoven University of Technology, Eindhoven, The Netherlands.

**Figure S1. Nanoparticle nomenclature and composition.**


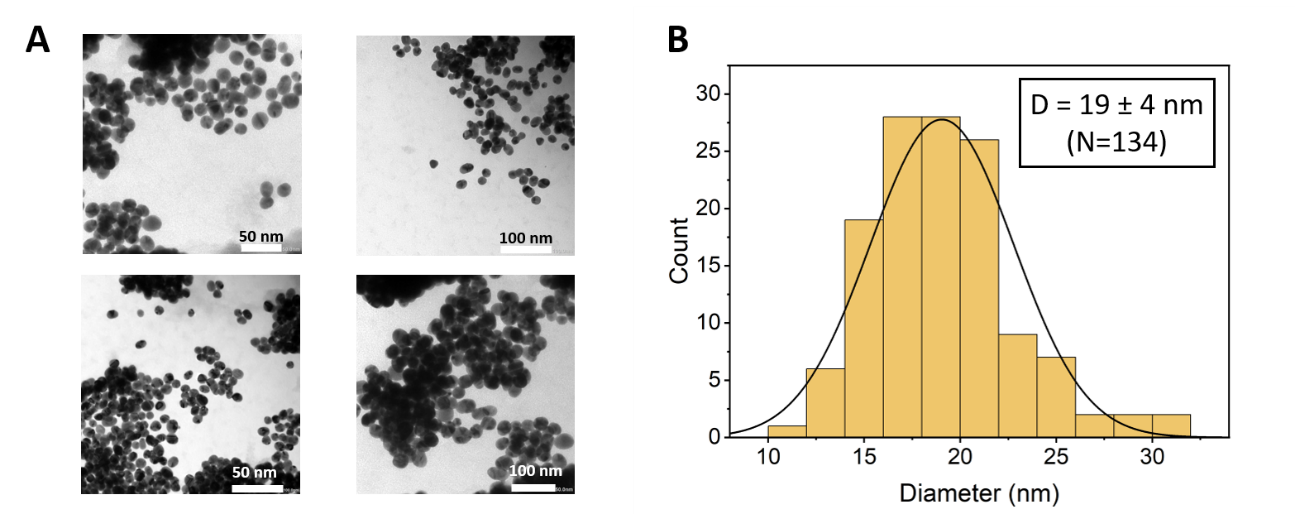


**Figure S2.** **A)** TEM images of the as-prepared HRP-AuNCs showing the presence of spherical gold nanoparticles. **B)** Nanoparticle size distribution graph obtained from analysing the TEM images.


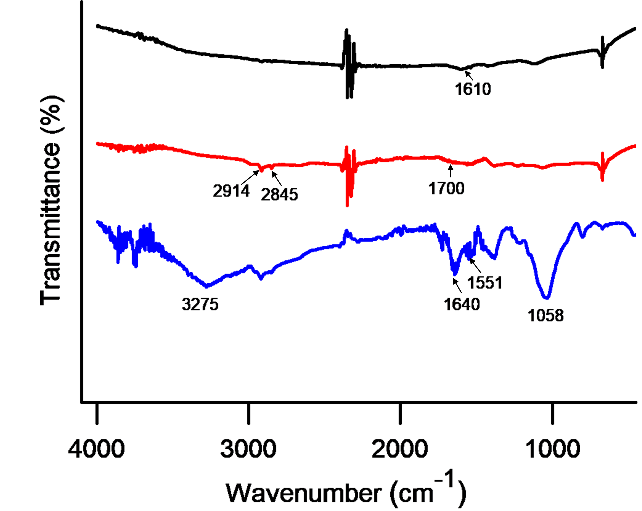


**Figure S3.** **FT-IR analysis of prepared nanodevices.** FT-IR spectra of AuNPs (black), (3-MPA) -AuNCs (red) and HRP-AuNCs (blue), showing the characteristic absorption bands of each functionalization process.

**Figure S4**. **AuNPs and HRP-AuNCs catalytic activity**. Kinetics of ABTS oxidation by AuNPs (red) and **HRP-AuNCs** (black) measured for 2 min at 405 nm. It can be appreciated that the AuNPs showed negligible activity whereas a sharp increase in ABTS oxidation is observed in the presence of HRP-AuNCs.

**Figure S5. AuNPs for EPT in breast cancer cells**. Cell viability analysis in **A)** MDA-MB-231 and **B)** MCF-7 incubated with AuNPs in the absence or presence of IAA. Cell viability was determined after 48 h of incubation by WST-1 assay. Data represent means ± SEM (n=3). Statistically significance was determined by one-way ANOVA and Dunns post-test. No significant difference was observed.

**A**

**B**

**Figure S6**. **MDA-MB-231 multicellular tumour spheroid-like cultures.** The structures present apoptotic/necrotic areas in the center. The images were taken under an optical microscope.
